# Supplementary material
Source: PubMed Central journal article supplement (PMC8332604)
Supplement: 43441_2021_282_MOESM1_ESM.pdf [file 43441_2021_282_MOESM1_ESM.pdf]

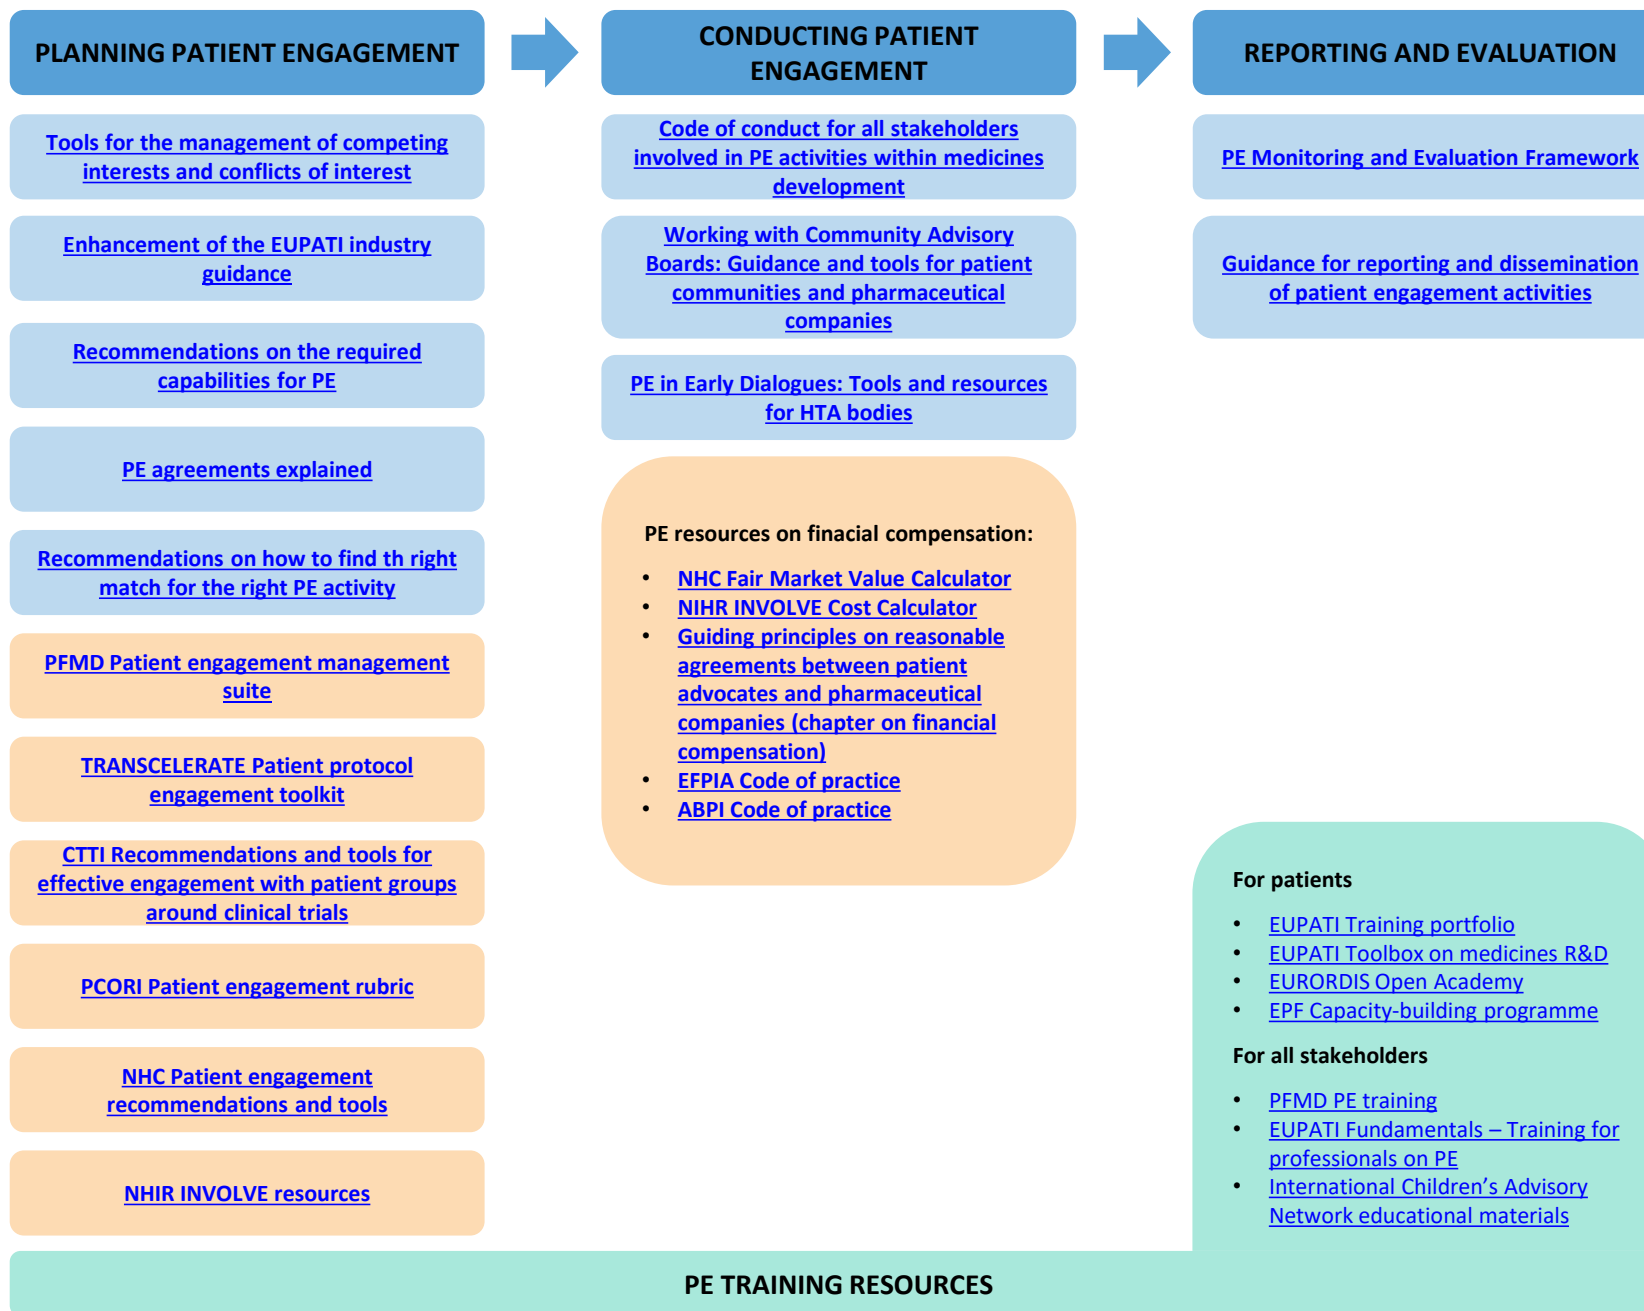

Fig. 4 Integrated resources, guidance and tools covering PE phases

|                                                                                      |                                                                                                                               |
|--------------------------------------------------------------------------------------|-------------------------------------------------------------------------------------------------------------------------------|
| <b>Public-private consortia</b>                                                      | <a href="#">European Patients' Academy (EUPATI)</a>                                                                           |
|                                                                                      | <a href="#">Patient-Focused Medicines Development (PFMD)</a>                                                                  |
|                                                                                      | <a href="#">National Health Council (NHC)</a>                                                                                 |
|                                                                                      | <a href="#">Clinical Trials Transformation Initiative</a>                                                                     |
|                                                                                      | <a href="#">Faster Cures</a>                                                                                                  |
| <b>Harmonisation bodies</b>                                                          | <a href="#">The International Council for Harmonisation of Technical Requirements for Pharmaceuticals for Human Use (ICH)</a> |
|                                                                                      | <a href="#">Council for International Organizations of Medical Sciences (CIOMS)</a>                                           |
| <b>Supra-national bodies</b>                                                         | <a href="#">World Health Organisation (WHO)</a>                                                                               |
| <b>Regulatory science platforms</b>                                                  | <a href="#">Heads of Medicines Agencies (HMA) network</a>                                                                     |
|                                                                                      | <a href="#">International Coalition of Medicines Regulatory Authorities (ICMRA)</a>                                           |
| <b>Health Technology Assessment and medicines pricing and reimbursement networks</b> | <a href="#">European network for Health Technology Assessment (EUnetHTA)</a>                                                  |
|                                                                                      | <a href="#">Health Technology Assessment international (HTAi)</a>                                                             |
|                                                                                      | <a href="#">Medicine Evaluation Committee (MEDEV)</a>                                                                         |
| <b>Multi-stakeholder networking platforms</b>                                        | <a href="#">Patient Engagement Open Forum (PEOF)</a>                                                                          |
|                                                                                      | The European Federation of Pharmaceutical Industries and Associations (EFPIA) Annual Conference                               |
|                                                                                      | <a href="#">European Medicines Agency Patients' and Consumers Working Party</a>                                               |
|                                                                                      | <a href="#">European Federation of Pharmaceutical Industries and Associations (EFPIA) Patient Think Tank</a>                  |
|                                                                                      | <a href="#">European Patients Forum (EPF) Congress on Patient Involvement</a>                                                 |
|                                                                                      | <a href="#">European Conference on Rare Diseases (ECRD)</a>                                                                   |
|                                                                                      | <a href="#">Health Technology Assessment International (HTAi) Annual Meeting</a>                                              |
|                                                                                      | <a href="#">Drug Information Association (DIA)</a>                                                                            |
|                                                                                      | <a href="#">Biotechnology Innovation Organization</a>                                                                         |
|                                                                                      | <a href="#">Partnering for cures (Faster Cures)</a>                                                                           |
|                                                                                      | <a href="#">International Society for Pharmacoeconomics and Outcomes Research (ISPOR) Patient Representative Roundtable</a>   |
|                                                                                      | <a href="#">ISPOR conferences</a>                                                                                             |
|                                                                                      | <a href="#">PFMD Synapse for patient engagement</a>                                                                           |

Fig. 5 Platforms important for PE sustainability
